# Supplementary material for: GlycA Levels during the Earliest Stages of Rheumatoid Arthritis: Potential Use as a Biomarker of Subclinical Cardiovascular Disease
Source: PubMed Central journal article supplement (PMC7463667; doi:10.3390/jcm9082472), 2020-08-01
Supplement: jcm-09-02472-s001.pdf [file jcm-09-02472-s001.pdf]

**Table S1.** Lipoprotein characterization by <sup>1</sup>H-NMR. An advanced characterization of the lipoprotein profile was performed by H-NMR in all study subjects. Differences were assessed by ANOVA test. Variables were summarized as mean ± SD.

|                                   | <b>HC</b><br><i>n</i> = 28 | <b>CSA</b><br><i>n</i> = 14 | <b>RA</b><br><i>n</i> = 82 | <i>p</i> -Value |
|-----------------------------------|----------------------------|-----------------------------|----------------------------|-----------------|
| <b><i>Lipoprotein profile</i></b> |                            |                             |                            |                 |
| VLDL-C (mg/dl)                    | 12.93±7.86                 | 13.07±7.64                  | 17.50±12.78                | 0.116           |
| IDL-C (mg/dl)                     | 9.66±4.08                  | 9.43±4.42                   | 11.74±5.13                 | 0.076           |
| LDL-C (mg/dl)                     | 133.49±23.65               | 133.51±26.67                | 136.62±30.79               | 0.851           |
| HDL-C (mg/dl)                     | 57.53±11.91                | 58.70±11.90                 | 53.69±12.53                | 0.186           |
| VLDL-TG (mg/dl)                   | 62.46±28.97                | 60.90±32.89                 | 78.94±63.97                | 0.270           |
| IDL-TG (mg/dl)                    | 10.58±3.36                 | 10.04±3.49                  | 12.07±3.77                 | 0.055           |
| LDL-TG (mg/dl)                    | 15.51±4.63                 | 15.67±4.34                  | 17.79±5.44                 | 0.079           |
| HDL-TG (mg/dl)                    | 16.03±4.14                 | 15.28±5.99                  | 16.63±4.81                 | 0.577           |
| VLDL-P (nmol/l)                   | 45.90±22.90                | 44.20±24.48                 | 57.90±43.04                | 0.216           |
| Large VLDL-P (nmol/l)             | 1.21±0.50                  | 1.14±0.51                   | 1.47±0.80                  | 0.141           |
| Medium VLDL-P (nmol/l)            | 4.08±2.28                  | 4.66±2.34                   | 5.79±7.21                  | 0.405           |
| Small VLDL-P (nmol/l)             | 40.62±21.09                | 38.36±21.84                 | 50.63±36.11                | 0.207           |
| LDL-P (nmol/l)                    | 1351.98±268.29             | 1339.99±283.15              | 1400.82±321.86             | 0.658           |
| Large LDL-P (nmol/l)              | 186.78±26.28               | 188.17±33.89                | 189.20±37.76               | 0.951           |
| Medium LDL-P (nmol/l)             | 394.18±98.42               | 408.57±111.69               | 422.90±140.32              | 0.588           |
| Small LDL-P (nmol/l)              | 771.15±178.04              | 743.23±193.69               | 788.71±206.98              | 0.710           |
| HDL-P (μmol/l)                    | 29.27±4.60                 | 29.51±4.36                  | 27.78±5.25                 | 0.258           |
| Large HDL-P (μmol/l)              | 0.26±0.04                  | 0.26±0.03                   | 0.27±0.04                  | 0.685           |
| Medium HDL-P (μmol/l)             | 9.79±1.81                  | 9.97±1.52                   | 9.54±1.59                  | 0.581           |
| Small HDL-P (μmol/l)              | 19.18±3.31                 | 19.27±3.33                  | 9.54±1.59                  | 0.262           |
| VLDL diameter (nm)                | 42.00±0.56                 | 42.18±0.34                  | 42.03±0.42                 | 0.466           |
| LDL diameter (nm)                 | 21.02±0.28                 | 21.11±0.35                  | 21.03±0.38                 | 0.758           |
| HDL diameter (nm)                 | 8.26±0.09                  | 8.27±0.06                   | 8.29±0.10                  | 0.266           |

**Table S2.** Analysis of the GlycA-attributed moderate to high reclassification. Demographic parameters, cardiometabolic factors, clinical characteristics and advanced lipoprotein features were compared between patients reclassified to the high risk category ( $n = 20$ ) and those staying in the moderate category ( $n = 26$ ) after adding GlycA to the mSCORE. Differences were assessed by Mann-Whitney U tests,  $\chi^2$  tests or t tests, as appropriate. Variables were summarized as median (interquartile range), mean  $\pm$  SD or  $n(\%)$ , as appropriate.

|                                            | <b>High Risk-reclassified<br/>(<math>n = 20</math>)</b> | <b>Moderate Risk Non-reclassified<br/>(<math>n = 26</math>)</b> | <b><i>p</i>-Value</b> |
|--------------------------------------------|---------------------------------------------------------|-----------------------------------------------------------------|-----------------------|
| Age (years), mean (range)                  | 64.29<br>(49.75-83.67)                                  | 57.79<br>(48.08-76.50)                                          | 0.058                 |
| Gender (female/male)                       | 17/3                                                    | 22/4                                                            | 0.971                 |
| <b><i>Clinical features</i></b>            |                                                         |                                                                 |                       |
| Duration of symptoms (weeks)               | 14.00 (14.00)                                           | 24.00 (22.00)                                                   | 0.436                 |
| Morning stiffness (minutes)                | 60.00 (97.50)                                           | 45.00 (83.80)                                                   | 0.551                 |
| Tender Joint Count                         | 8.50 (9.00)                                             | 10.00 (8.00)                                                    | 0.955                 |
| Swollen Joint Count                        | 6.00 (6.00)                                             | 5.50 (6.00)                                                     | 0.547                 |
| ESR (mm/h)                                 | 25.50 (20.00)                                           | 24.50 (27.00)                                                   | 0.557                 |
| CRP (mg/dl)                                | 1.35 (3.50)                                             | 0.90 (2.00)                                                     | 0.106                 |
| Patient Global Assessment (VAS 0-100)      | 70.00 (38.00)                                           | 80.00 (20.00)                                                   | 0.362                 |
| Pain Assessment (VAS 0-10)                 | 7.00 (3.00)                                             | 7.00 (2.00)                                                     | 0.479                 |
| DAS28                                      | 5.42 (1.60)                                             | 5.57 (1.04)                                                     | 0.727                 |
| SDAI                                       | 28.15 (16.00)                                           | 30.30 (16.30)                                                   | 0.850                 |
| HAQ                                        | 1.60 (1.00)                                             | 1.10 (1.00)                                                     | 0.672                 |
| Fatigue (VAS 0-10)                         | 5.00 (7.00)                                             | 6.00 (8.00)                                                     | 0.532                 |
| RF+, $n(\%)$                               | 12 (60.0)                                               | 20 (76.9)                                                       | 0.216                 |
| ACPA+, $n(\%)$                             | 12 (60.0)                                               | 17 (65.3)                                                       | 0.577                 |
| <b><i>Traditional CV risk factors</i></b>  |                                                         |                                                                 |                       |
| Hypertension, $n(\%)$                      | 12 (60.0)                                               | 6 (23.0)                                                        | 0.016                 |
| Diabetes, $n(\%)$                          | 3 (15.0)                                                | 2 (7.69)                                                        | 0.430                 |
| Dyslipidemia, $n(\%)$                      | 8 (40.0)                                                | 8 (30.7)                                                        | 0.450                 |
| Smoking, $n(\%)$                           | 7 (35.0)                                                | 9 (34.6)                                                        | 0.878                 |
| Obesity, $n(\%)$                           | 11 (55.0)                                               | 11 (42.3)                                                       | 0.432                 |
| Waist circumference                        | 105.50 (22.00)                                          | 100.00 (23.50)                                                  | 0.333                 |
| <b><i>Glucose homeostasis features</i></b> |                                                         |                                                                 |                       |
| Glucose (mg/dl)                            | 100.00 (22.00)                                          | 99.00 (13.00)                                                   | 0.764                 |
| Insulin ( $\mu$ U/ml)                      | 11.45 (16.20)                                           | 9.90 (12.10)                                                    | 0.151                 |
| C-peptide (ng/ml)                          | 3.20 (1.50)                                             | 2.61 (2.10)                                                     | 0.660                 |
| HOMA-IR                                    | 1.50 (2.03)                                             | 1.30 (1.65)                                                     | 0.175                 |
| QUICKI                                     | 0.32 (0.04)                                             | 0.33 (0.06)                                                     | 0.112                 |
| <b><i>Lipoprotein profile</i></b>          |                                                         |                                                                 |                       |
| VLDL-C (mg/dl)                             | 20.31 $\pm$ 9.61                                        | 12.24 $\pm$ 7.97                                                | 0.003                 |
| IDL-C (mg/dl)                              | 13.75 $\pm$ 5.05                                        | 10.36 $\pm$ 4.13                                                | 0.016                 |
| LDL-C (mg/dl)                              | 148.28 $\pm$ 27.39                                      | 138.85 $\pm$ 30.91                                              | 0.288                 |
| HDL-C (mg/dl)                              | 56.13 $\pm$ 14.00                                       | 57.30 $\pm$ 12.70                                               | 0.768                 |
| VLDL-TG (mg/dl)                            | 85.67 $\pm$ 38.42                                       | 58.47 $\pm$ 30.00                                               | 0.010                 |
| IDL-TG (mg/dl)                             | 13.92 $\pm$ 4.06                                        | 10.93 $\pm$ 2.99                                                | 0.006                 |
| LDL-TG (mg/dl)                             | 20.63 $\pm$ 5.96                                        | 17.43 $\pm$ 4.55                                                | 0.045                 |
| HDL-TG (mg/dl)                             | 18.79 $\pm$ 5.60                                        | 16.01 $\pm$ 4.18                                                | 0.060                 |
| VLDL-P (nmol/l)                            | 64.50 $\pm$ 28.29                                       | 42.72 $\pm$ 23.86                                               | 0.007                 |
| Large VLDL-P (nmol/l)                      | 1.55 $\pm$ 0.58                                         | 1.15 $\pm$ 0.51                                                 | 0.018                 |
| Medium VLDL-P (nmol/l)                     | 5.96 $\pm$ 3.19                                         | 4.08 $\pm$ 1.91                                                 | 0.017                 |
| Small VLDL-P (nmol/l)                      | 56.99 $\pm$ 27.49                                       | 37.48 $\pm$ 21.95                                               | 0.007                 |
| LDL-P (nmol/l)                             | 1540.67 $\pm$ 296.25                                    | 1396.31 $\pm$ 308.28                                            | 0.117                 |
| Large LDL-P (nmol/l)                       | 201.18 $\pm$ 32.03                                      | 195.00 $\pm$ 35.43                                              | 0.544                 |
| Medium LDL-P (nmol/l)                      | 471.80 $\pm$ 116.17                                     | 445.49 $\pm$ 142.48                                             | 0.506                 |
| Small LDL-P (nmol/l)                       | 867.68 $\pm$ 217.05                                     | 745.82 $\pm$ 176.00                                             | 0.050                 |
| HDL-P ( $\mu$ mol/l)                       | 29.39 $\pm$ 5.79                                        | 28.72 $\pm$ 5.15                                                | 0.684                 |
| Large HDL-P ( $\mu$ mol/l)                 | 0.29 $\pm$ 0.05                                         | 0.27 $\pm$ 0.05                                                 | 0.193                 |

|                                    |                  |                  |       |
|------------------------------------|------------------|------------------|-------|
| Medium HDL-P ( $\mu\text{mol/l}$ ) | 9.76 $\pm$ 1.90  | 10.15 $\pm$ 1.66 | 0.466 |
| Small HDL-P ( $\mu\text{mol/l}$ )  | 19.32 $\pm$ 4.37 | 18.29 $\pm$ 4.21 | 0.423 |
| VLDL diameter (nm)                 | 41.86 $\pm$ 0.20 | 42.14 $\pm$ 0.58 | 0.028 |
| LDL diameter (nm)                  | 21.00 $\pm$ 0.35 | 21.17 $\pm$ 0.36 | 0.134 |
| HDL diameter (nm)                  | 8.27 $\pm$ 0.08  | 8.32 $\pm$ 0.12  | 0.110 |

---

**Table S3.** Analysis of the GlycA-attributed low to moderate reclassification. Demographic parameters, cardiometabolic factors, clinical characteristics and advanced lipoprotein features were compared between patients reclassified to the moderate risk category ( $n = 15$ ) and those staying in the low category ( $n = 6$ ) after adding GlycA to the mSCORE. Differences were assessed by Mann-Whitney U tests,  $\chi^2$  tests, Fischer exact tests, or t tests, as appropriate. Variables were summarized as median (interquartile range), mean  $\pm$  SD or  $n(\%)$ , as appropriate.

|                                            | <b>Moderate risk-reclassified<br/>(<math>n = 15</math>)</b> | <b>Low risk non-reclassified<br/>(<math>n = 6</math>)</b> | <b><i>p</i>-Value</b> |
|--------------------------------------------|-------------------------------------------------------------|-----------------------------------------------------------|-----------------------|
| Age (years), mean (range)                  | 44.25<br>(30.33 – 71.42)                                    | 44.83<br>(37.33-52.33)                                    | 0.910                 |
| Gender (female/male)                       | 14/1                                                        | 6/0                                                       | 1.000                 |
| <b><i>Clinical features</i></b>            |                                                             |                                                           |                       |
| Duration of symptoms (weeks)               | 17.00 (21.00)                                               | 19.00 (16.00)                                             | 0.132                 |
| Morning stiffness (minutes)                | 60.00 (95.00)                                               | 62.50 (50.00)                                             | 0.302                 |
| Tender Joint Count                         | 8.50 (5.00)                                                 | 5.50 (3.00)                                               | 0.036                 |
| Swollen Joint Count                        | 5.50 (5.00)                                                 | 4.50 (3.00)                                               | 0.302                 |
| ESR (mm/h)                                 | 35.00 (38.00)                                               | 17.50 (26.00)                                             | 0.005                 |
| CRP (mg/dl)                                | 0.90 (1.10)                                                 | 0.15 (1.00)                                               | 0.008                 |
| Patient Global Assessment (VAS 0-100)      | 75.00 (33.00)                                               | 50.00 (35.00)                                             | 0.003                 |
| Pain Assessment (VAS 0-10)                 | 7.50 (2.00)                                                 | 4.50 (2.00)                                               | 0.011                 |
| DAS28                                      | 5.57 (1.63)                                                 | 4.46 (1.12)                                               | 0.001                 |
| SDAI                                       | 27.60 (9.50)                                                | 11.10 (6.00)                                              | 0.002                 |
| HAQ                                        | 1.40 (1.00)                                                 | 0.35 (1.00)                                               | 0.002                 |
| Fatigue (VAS 0-10)                         | 7.00 (3.00)                                                 | 3.00 (4.00)                                               | 0.645                 |
| RF+, $n(\%)$                               | 12 (80.0)                                                   | 3 (50.0)                                                  | 0.291                 |
| ACPA+, $n(\%)$                             | 12 (80.0)                                                   | 4 (66.6)                                                  | 0.598                 |
| <b><i>Traditional CV risk factors</i></b>  |                                                             |                                                           |                       |
| Hypertension, $n(\%)$                      | 2 (13.3)                                                    | 0 (0.0)                                                   | 0.347                 |
| Diabetes, $n(\%)$                          | 0 (0.0)                                                     | 0 (0.0)                                                   | -                     |
| Dyslipidemia, $n(\%)$                      | 2 (13.3)                                                    | 0 (0.0)                                                   | 0.347                 |
| Smoking, $n(\%)$                           | 8 (53.3)                                                    | 0 (0.0)                                                   | 0.046                 |
| Obesity, $n(\%)$                           | 5 (30.0)                                                    | 2 (33.3)                                                  | 1.000                 |
| Waist circumference                        | 102.00 (16.25)                                              | 82.00 (20.00)                                             | 0.333                 |
| <b><i>Glucose homeostasis features</i></b> |                                                             |                                                           |                       |
| Glucose (mg/dl)                            | 91.00 (19.00)                                               | 89.00 (15.00)                                             | 0.970                 |
| Insulin ( $\mu$ U/ml)                      | 10.15 (8.10)                                                | 6.65 (5.00)                                               | 0.549                 |
| C-peptide (ng/ml)                          | 2.61 (1.70)                                                 | 1.97 (1.25)                                               | 0.442                 |
| HOMA-IR                                    | 1.30 (1.13)                                                 | 0.85 (1.00)                                               | 0.549                 |
| QUICKI                                     | 0.33 (0.06)                                                 | 0.36 (0.04)                                               | 0.350                 |
| <b><i>Lipoprotein profile</i></b>          |                                                             |                                                           |                       |
| VLDL-C (mg/dl)                             | 15.72 $\pm$ 8.83                                            | 8.87 $\pm$ 3.84                                           | 0.023                 |
| IDL-C (mg/dl)                              | 10.32 $\pm$ 4.03                                            | 8.12 $\pm$ 2.83                                           | 0.239                 |
| LDL-C (mg/dl)                              | 134.91 $\pm$ 22.66                                          | 129.37 $\pm$ 29.61                                        | 0.648                 |
| HDL-C (mg/dl)                              | 51.86 $\pm$ 11.34                                           | 53.78 $\pm$ 8.65                                          | 0.714                 |
| VLDL-TG (mg/dl)                            | 65.94 $\pm$ 29.67                                           | 41.91 $\pm$ 14.27                                         | 0.076                 |
| IDL-TG (mg/dl)                             | 11.18 $\pm$ 3.30                                            | 8.51 $\pm$ 1.97                                           | 0.083                 |
| LDL-TG (mg/dl)                             | 16.28 $\pm$ 3.98                                            | 14.37 $\pm$ 4.72                                          | 0.358                 |
| HDL-TG (mg/dl)                             | 15.91 $\pm$ 4.33                                            | 14.85 $\pm$ 3.85                                          | 0.608                 |
| VLDL-P (nmol/l)                            | 49.50 $\pm$ 24.19                                           | 30.39 $\pm$ 10.68                                         | 0.081                 |
| Large VLDL-P (nmol/l)                      | 1.35 $\pm$ 0.44                                             | 0.91 $\pm$ 0.40                                           | 0.052                 |
| Medium VLDL-P (nmol/l)                     | 4.50 $\pm$ 1.78                                             | 3.10 $\pm$ 1.26                                           | 0.099                 |
| Small VLDL-P (nmol/l)                      | 43.65 $\pm$ 22.15                                           | 26.37 $\pm$ 9.78                                          | 0.023                 |
| LDL-P (nmol/l)                             | 1367.93 $\pm$ 232.10                                        | 1266.55 $\pm$ 264.75                                      | 0.395                 |
| Large LDL-P (nmol/l)                       | 188.31 $\pm$ 30.78                                          | 192.20 $\pm$ 37.93                                        | 0.809                 |
| Medium LDL-P (nmol/l)                      | 409.75 $\pm$ 96.39                                          | 394.74 $\pm$ 170.03                                       | 0.799                 |
| Small LDL-P (nmol/l)                       | 769.86 $\pm$ 135.77                                         | 679.60 $\pm$ 69.31                                        | 0.142                 |
| HDL-P ( $\mu$ mol/l)                       | 27.28 $\pm$ 5.21                                            | 26.34 $\pm$ 4.19                                          | 0.699                 |
| Large HDL-P ( $\mu$ mol/l)                 | 0.25 $\pm$ 0.03                                             | 0.27 $\pm$ 0.03                                           | 0.174                 |

|                                    |                  |                  |       |
|------------------------------------|------------------|------------------|-------|
| Medium HDL-P ( $\mu\text{mol/l}$ ) | 9.01 $\pm$ 1.01  | 10.30 $\pm$ 0.55 | 0.010 |
| Small HDL-P ( $\mu\text{mol/l}$ )  | 18.01 $\pm$ 4.51 | 15.76 $\pm$ 3.91 | 0.299 |
| VLDL diameter (nm)                 | 42.02 $\pm$ 0.29 | 42.15 $\pm$ 0.43 | 0.423 |
| LDL diameter (nm)                  | 21.03 $\pm$ 0.24 | 21.18 $\pm$ 0.28 | 0.241 |
| HDL diameter (nm)                  | 8.27 $\pm$ 0.07  | 8.37 $\pm$ 0.10  | 0.059 |

---

**Table S4.** GlycB as predictor of treatment outcomes in early RA. The role of GlycB as predictor of treatment outcomes upon csDMARD treatment in treatment-naïve, early RA patients was analysed by univariate and multivariate logistic regression analyses. DAS28 remission status at 6 and 12 months after treatment initiation was entered as the dependent variable.

|                                | 6 months |               |                 | 12 months |               |                 |
|--------------------------------|----------|---------------|-----------------|-----------|---------------|-----------------|
|                                | OR       | 95% CI        | <i>p</i> -value | OR        | 95% CI        | <i>p</i> -value |
| <i>Univariate</i>              |          |               |                 |           |               |                 |
| GlycB, per unit                | 0.988    | 0.979 – 0.998 | 0.015           | 0.990     | 0.981 – 0.999 | 0.048           |
| <i>Multivariate</i>            |          |               |                 |           |               |                 |
| GlycB, per unit                | 0.989    | 0.979 – 1.001 | 0.051           | 0.900     | 0.980 – 1.002 | 0.058           |
| Age at onset, per year         | 1.002    | 0.932 – 1.076 | 0.966           | 1.030     | 0.949 – 1.117 | 0.479           |
| Gender, female                 | 0.781    | 0.131 – 4.659 | 0.786           | 1.505     | 0.241 – 9.348 | 0.662           |
| Duration of symptoms, per week | 0.988    | 0.950 – 1.020 | 0.388           | 0.987     | 0.947 – 1.028 | 0.520           |
| RF, +                          | 0.465    | 0.080 – 2.702 | 0.465           | 0.528     | 0.092 – 3.027 | 0.473           |
| ACPA, +                        | 1.464    | 0.252 – 8.511 | 0.671           | 1.535     | 0.260 – 9.065 | 0.636           |
